# Supplementary material for: Response of primary tumor and lymph node in non-small cell lung cancer after neoadjuvant immunotherapy: a pooled analysis
Source: PubMed Central journal article supplement — J Immunother Cancer. 2022 Sep 15;10(9):e005160. doi: 10.1136/jitc-2022-005160 (PMC9478833; doi:10.1136/jitc-2022-005160), 2022-09-15

## Supplemental materials

### Contents

|                                                    |          |
|----------------------------------------------------|----------|
| <b>1. Search strategy .....</b>                    | <b>2</b> |
| <b>2. The inclusion criteria.....</b>              | <b>3</b> |
| <b>3. Characteristics of included studies.....</b> | <b>4</b> |
| <b>4. Risk of bias in cohort study .....</b>       | <b>5</b> |
| <b>5. Supplemental figure legend .....</b>         | <b>6</b> |
| <b>6. Supplemental figure .....</b>                | <b>7</b> |



**The inclusion criteria**

- (a) prospective phase I, phase II or phase III clinical trials for pathologically diagnosed stage I-III NSCLC;
- (b) neoadjuvant therapy with at least one ICI;
- (c) reporting ypT(MPR), ypT0 , and nodal downstaging as clinical outcomes.

**Supplementary Table 1** Characteristics of included studies.

| First author            | Intervention model                                                                                          | Masking    | Study type   | Study phase | Recruitment criteria                      | Type of article | Regimen                                                |
|-------------------------|-------------------------------------------------------------------------------------------------------------|------------|--------------|-------------|-------------------------------------------|-----------------|--------------------------------------------------------|
| Provencio M, 2020 [2]   | Single-arm<br>Preoperative pathological evaluation of mediastinal lymph nodes: thoracotomy                  | Open-Label | Cohort study | II          | Stage IIIA, EBUS-TBNA, mediastinoscopy or | Article         | Nivolumab + paclitaxel + carboplatin                   |
| Rothschild SI, 2021 [3] | Single-arm<br>Preoperative pathological evaluation of mediastinal lymph nodes: EBUS-TBNA or mediastinoscopy | Open-Label | Cohort study | II          | Stage IIIA (N2)                           | Article         | Cisplatin + docetaxel + sequential durvalumab          |
| Shu CA, 2020 [4]        | Single-arm<br>Preoperative pathological evaluation of mediastinal lymph nodes: no required                  | Open-Label | Cohort study | II          | Stage IB–IIIA                             | Article         | Atezolizumab + nab-paclitaxel + carboplatin            |
| Forde PM, 2018 [5]      | Single-arm<br>Preoperative pathological evaluation of mediastinal lymph nodes: EBUS-TBNA or mediastinoscopy | Open-Label | Cohort study | II          | Stage I–IIIA                              | Article         | Nivolumab                                              |
| Gao S, 2020 [6]         | Single-arm<br>Preoperative pathological evaluation of mediastinal lymph nodes: no required                  | Open-Label | Cohort study | Ib          | Stage IA–IIIB                             | Article         | Sintilimab                                             |
| Zhao Z, 2021 [7]        | Single-arm<br>Preoperative pathological evaluation of mediastinal lymph nodes: EBUS-TBNA or mediastinoscopy | Open-Label | Cohort study | II          | Stage IIIA–IIIB                           | Article         | pemetrexed/ nab-paclitaxel + carboplatin + toripalimab |

EBUS-TBNA: Endobronchial ultrasound transbronchial needle aspiration.



**Supplemental Table 2** Risk of bias in cohort study

---

| Study | Selection | comparability | outcome | score |
|-------|-----------|---------------|---------|-------|
|-------|-----------|---------------|---------|-------|

---

|                         | Representativeness of the exposed | Selection of the non-exposed | Ascertainment of exposure | Outcome of interest was not present | Comparability of Cohorts on the Basis | Assessment of Outcome | Enough follow-up | Adequacy of follow up |   |
|-------------------------|-----------------------------------|------------------------------|---------------------------|-------------------------------------|---------------------------------------|-----------------------|------------------|-----------------------|---|
| Provencio M, 2020 [2]   | 1                                 | N/A                          | 1                         | 1                                   | N/A                                   | 1                     | 1                | 1                     | 6 |
| Rothschild SI, 2021 [3] | 1                                 | N/A                          | 1                         | 1                                   | N/A                                   | 0                     | 0                | 1                     | 4 |
| Shu CA, 2020 [4]        | 1                                 | N/A                          | 1                         | 1                                   | N/A                                   | 1                     | 0                | 1                     | 5 |
| Forde PM, 2018 [5]      | 1                                 | N/A                          | 1                         | 1                                   | N/A                                   | 1                     | 1                | 1                     | 6 |
| Gao S, 2020 [6]         | 1                                 | N/A                          | 1                         | 1                                   | N/A                                   | 1                     | 0                | 1                     | 5 |
| Zhao Z, 2021 [7]        | 1                                 | N/A                          | 1                         | 1                                   | N/A                                   | 1                     | 1                | 1                     | 6 |

**Supplemental figure legend****Supplemental figure 1**

Flow diagram of publication search

**Supplemental figure 2**

**Supplemental figure 2A** Funnel plot of major pathological response versus nodal downstaging

**Supplemental figure 2B** Funnel plot of complete pathological response versus complete nodal clearance

**Supplemental figure 2C** Funnel plot of major pathological response versus complete nodal clearance



Supplemental figure 1

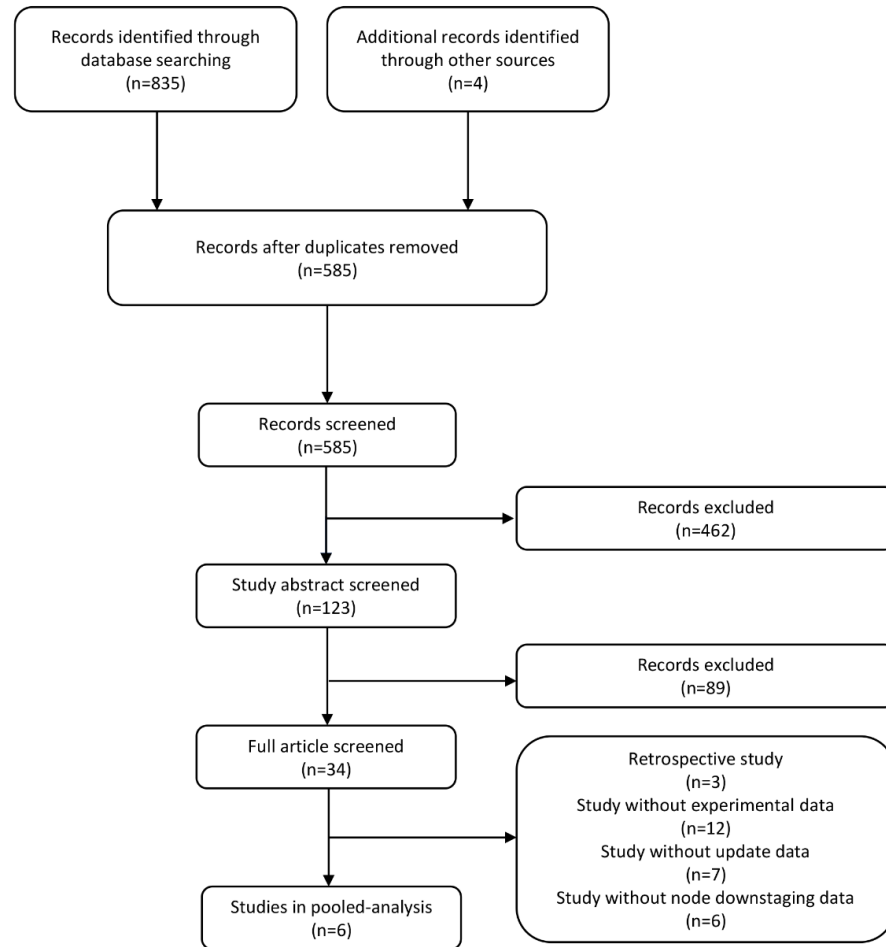

Supplemental figure 2

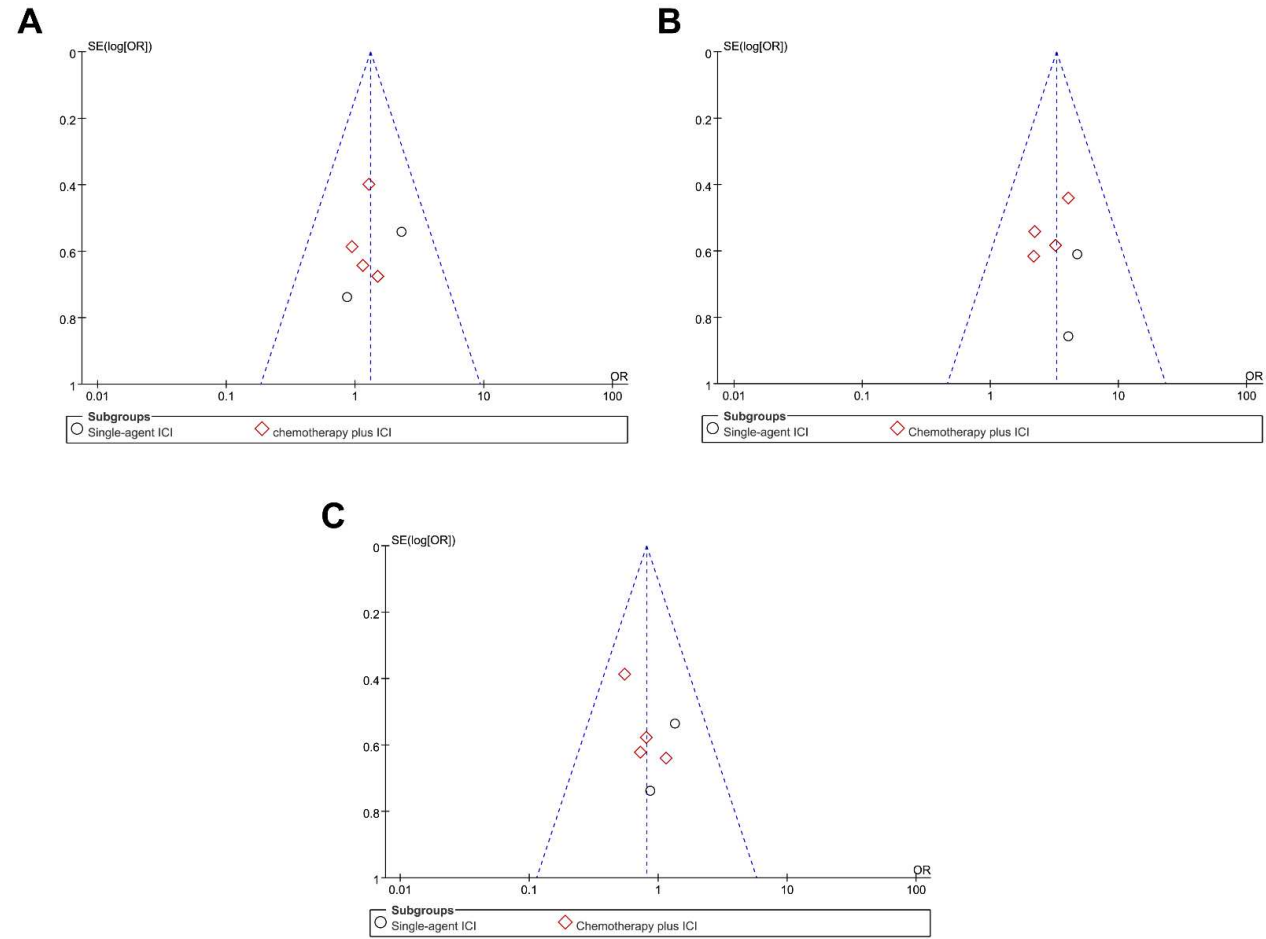

Supplement: jitc-2022-005160supp001.pdf [file jitc-2022-005160supp001.pdf]
